# Supplementary material for: Valorization of Green Biomass: Alfalfa Pulp as a Substrate for Oyster Mushroom Cultivation
Source: MDPI journal article supplement (doi:10.3390/foods11162519), 2022-08-20
Supplement: s1 [file s1]

**Table S1.** Chemical composition of three test substrates. The values are averages and standard deviations of 3 biological replicates. DM= dry matter.

| <b>Compounds (g/100g DM)</b> | <b>Alfalfa pulp</b> | <b>Mixture (50:50)</b> | <b>Straw</b>   |
|------------------------------|---------------------|------------------------|----------------|
| Ash                          | 1.83 ± 0.23 %       | 2.30 ± 0.10 %          | 1.89 ± 0.12 %  |
| Total Fiber                  | 60.88 ± 1.34 %      | 74.05 ± 0.99 %         | 83.29 ± 1.76 % |
| <i>Cellulose</i>             | 28.01 ± 1.14 %      | 34.86 ± 0.03 %         | 37.86 ± 1.15 % |
| <i>Hemicellulose</i>         | 16.48 ± 0.70 %      | 20.64 ± 1.02 %         | 25.07 ± 0.75 % |
| <i>Acid soluble lignin</i>   | 1.40 ± 0.01 %       | 1.32 ± 0.02 %          | 1.75 ± 0.01 %  |
| <i>Acid insoluble lignin</i> | 16.39 ± 0.64 %      | 18.55 ± 1.10 %         | 20.37 ± 1.11 % |
| Protein                      | 17.42 ± 0.24 %      | 10.12 ± 0.15 %         | 3.09 ± 0.04 %  |
| <i>Nitrogen</i>              | 2.79 ± 0.01 %       | 1.62 ± 0.01 %          | 0.45 ± 0.02 %  |
| Extractives                  | 20.65 ± 0.01 %      | 13.05 ± 0.84 %         | 12.73 ± 0.81 % |
